# Supplementary material for: Stabilized inverse Y2O3/Cu interfaces boost the performance of the reverse water–gas shift reaction
Source: Royal Society of Chemistry journal article supplement (doi:10.1039/d4cy00186a), 2024-01-01
Supplement: d4cy00186a1.pdf [file d4cy00186a1.pdf]

Electronic supporting Information

**Stabilized Inverse  $\text{Y}_2\text{O}_3/\text{Cu}$  Interfaces Boosted the Performance of Reverse  
Water-Gas Shift Reaction**

Zhi-Xin Li, Kai Xu, Wei-Wei Wang, Xin-Pu Fu, Chun-Jiang Jia\*

Key Laboratory for Colloid and Interface Chemistry, Key Laboratory of Special Aggregated Materials, School of Chemistry and Chemical Engineering, Shandong University, Jinan, 250100, China.

\*Corresponding Author. Email: [jiacj@sdu.edu.cn](mailto:jiacj@sdu.edu.cn)

## Experimental Section

**Materials.**  $\text{Cu}(\text{NO}_3)_2 \cdot 3\text{H}_2\text{O}$ ,  $\text{Y}(\text{NO}_3)_3 \cdot 6\text{H}_2\text{O}$ ,  $\text{Y}_2\text{O}_3$ ,  $\text{Cu}(\text{OH})_2$ , ethanol and anhydrous sodium carbonate were from Sinopharma Chemical Reagent Co., Ltd (the purity of all drugs were 99.9%). All gases used in the study were purchased from Jinan Deyang Special Gases Co., Ltd.

**Catalyst preparation.** Preparation of bare Cu catalyst. Usually, a certain amount of  $\text{Cu}(\text{NO}_3)_2 \cdot 3\text{H}_2\text{O}$  solution ( $0.01 \text{ g} \cdot \text{mL}^{-1}$ ) and sodium carbonate solution ( $0.5 \text{ mol} \cdot \text{L}^{-1}$ ) were added to 25 mL deionized water at the same time drop by drop at room temperature, and the pH value of the mixture was always 10.0. Then the blue mixture was stirred for 30 min and aged for 1 h. Next, the blue precipitates (The precursor of bare Cu catalyst) were obtained after filtering, washing and drying. The blue precipitates were calcined in Muffle furnace at  $400 \text{ }^\circ\text{C}$  for 4 h to obtain the bare Cu catalyst. Additional commercial  $\text{Cu}(\text{OH})_2$  or  $\text{Cu}(\text{NO}_3)_2 \cdot 3\text{H}_2\text{O}$  was calcined in Muffle furnace at  $400 \text{ }^\circ\text{C}$  for 4 h to obtain the bare  $\text{Cu-C}$  or  $\text{Cu-N}$  catalysts, respectively. The  $\text{Y}_2\text{O}_3/\text{Cu-CP}$  and  $\text{Cu}/\text{Y}_2\text{O}_3\text{-CP}$  catalyst was prepared by co-precipitation method. A certain amount of  $\text{Cu}(\text{NO}_3)_2 \cdot 3\text{H}_2\text{O}$  solution ( $0.01 \text{ g} \cdot \text{mL}^{-1}$ ) and  $\text{Y}(\text{NO}_3)_3 \cdot 6\text{H}_2\text{O}$  solution ( $0.01 \text{ g} \cdot \text{mL}^{-1}$ ) were simultaneously added to 25 ml deionized water, and the pH was adjusted to 10.0 by sodium carbonate solution ( $0.5 \text{ mol} \cdot \text{L}^{-1}$ ). After the same process as that of bare Cu catalyst,  $\text{Y}_2\text{O}_3/\text{Cu-CP}$  and  $\text{Cu}/\text{Y}_2\text{O}_3\text{-CP}$  catalyst was obtained.

## Supplementary Figures:

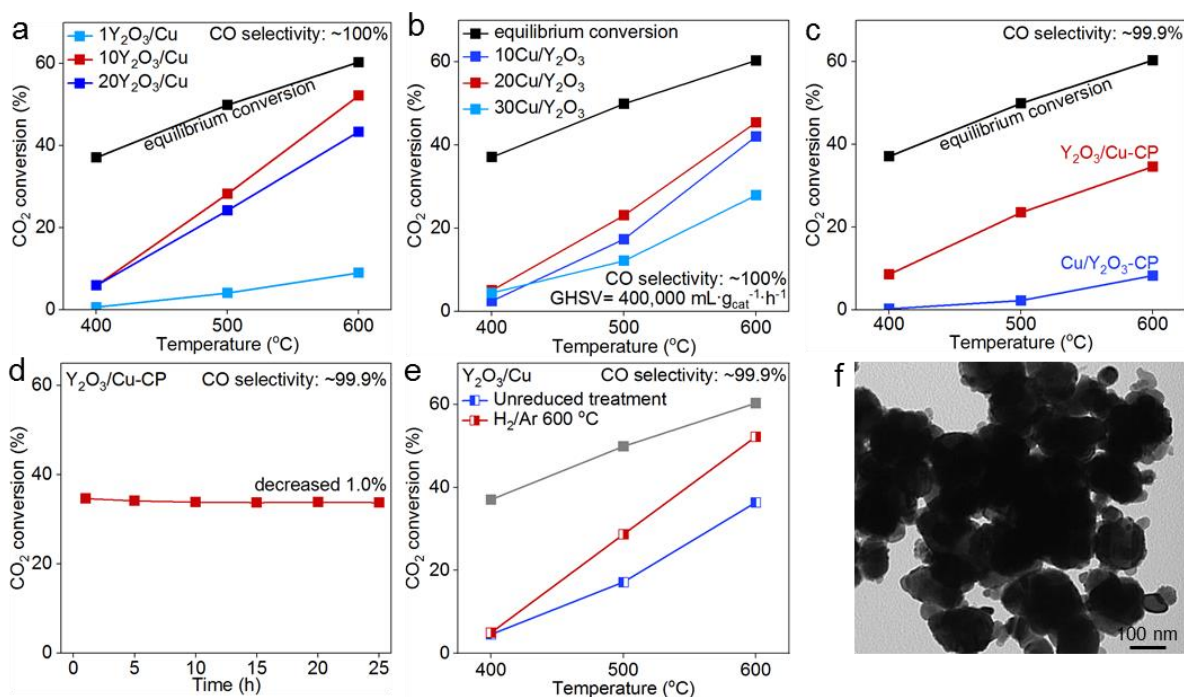

**Fig. S1.** RWGS reaction performance over (a) inverse Y<sub>2</sub>O<sub>3</sub>/Cu and (b) conventional Cu/Y<sub>2</sub>O<sub>3</sub> catalysts (calcination at 400 °C). (c) RWGS reaction performance over inverse Y<sub>2</sub>O<sub>3</sub>/Cu-CP and conventional Cu/Y<sub>2</sub>O<sub>3</sub>-CP catalysts constructed by co-precipitation. (d) Long-term stability of inverse Y<sub>2</sub>O<sub>3</sub>/Cu-CP catalysts constructed by co-precipitation in RWGS reaction. (e) RWGS reaction performance over as-prepared Y<sub>2</sub>O<sub>3</sub>/Cu catalyst without reduction treatment. (f) TEM images of as-prepared Y<sub>2</sub>O<sub>3</sub>/Cu catalyst (without reduction treatment) after reaction. (Reaction condition: 23%CO<sub>2</sub>/69%H<sub>2</sub>/8%N<sub>2</sub>, GHSV = 400,000 mL·g<sub>cat</sub><sup>-1</sup>·h<sup>-1</sup>)

CO<sub>2</sub> conversion of the inverse Y<sub>2</sub>O<sub>3</sub>/Cu catalysts increased first and then decreased with increasing of Y element loading, which might be caused by overloading of the active site (**Fig. S1a**). There was no significant improvement in catalytic performance while the Cu load of conventional Cu/Y<sub>2</sub>O<sub>3</sub> catalysts increased from 10 to 20% (**Fig. S1b**). Conventional Cu/Y<sub>2</sub>O<sub>3</sub>-CP (The mass ratio of Cu to Y<sub>2</sub>O<sub>3</sub> was 1: 9) and inverse Y<sub>2</sub>O<sub>3</sub>/Cu-CP (The mass ratio of Cu to Y<sub>2</sub>O<sub>3</sub> was 9: 1) catalysts were prepared by co-precipitation method (**Fig. S1c** and **d**). As shown in **Fig. S1c** and **d**, the CO<sub>2</sub> conversion of inverse Y<sub>2</sub>O<sub>3</sub>/Cu-CP catalyst (34.6%) constructed by co-precipitation was still higher than conventional Cu/Y<sub>2</sub>O<sub>3</sub>-CP catalyst (8.3%) constructed by co-precipitation at 600 °C, and inverse Y<sub>2</sub>O<sub>3</sub>/Cu-CP catalyst exhibited excellent long-term stability, which also confirmed that the inverse Y<sub>2</sub>O<sub>3</sub>/CuO<sub>x</sub>/Cu interfaces played an important role in RWGS reaction. As shown in **Fig. S1e**, when as-prepared sample with highly dispersed Y species were directly used for catalyzing the RWGS reaction without reduction treatment, its CO<sub>2</sub> conversion was poor, especially only 36.4% at 600 °C, which was much lower than the catalytic activity after 5%H<sub>2</sub>/Ar pretreatment (52.3% at 600 °C). In addition, it transformed into the inverse structure with small particles (Y<sub>2</sub>O<sub>3</sub>) embedded on surface of large particles (Cu) after reaction (**Fig. S1f**). It was noteworthy that the small particles size exceeded 20 nm, indicated that highly dispersed Y species has been occurred severe agglomeration, which might cause by violent reduction of the high concentration of H<sub>2</sub> (69%H<sub>2</sub>) in reaction atmosphere. Therefore, the severe agglomeration might lead to a serious loss of interface sites, thereby reducing catalytic activity.

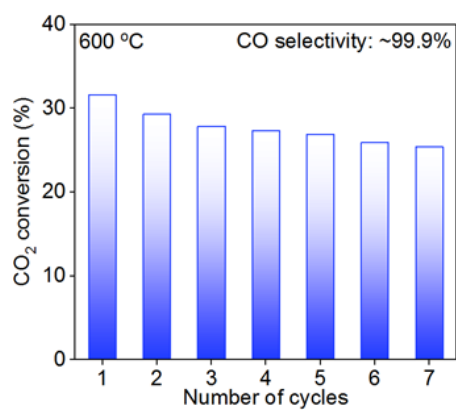

**Fig. S2.** Recycling performance of conventional Cu/Y<sub>2</sub>O<sub>3</sub> catalyst. (Reaction condition: 23%CO<sub>2</sub>/69%H<sub>2</sub>/8%N<sub>2</sub>, GHSV = 400,000 mL·g<sub>cat</sub><sup>-1</sup>·h<sup>-1</sup>)

The cold start recycling performance of conventional Cu/Y<sub>2</sub>O<sub>3</sub> catalyst was poor, and the CO<sub>2</sub> conversion decreased by 6.2% after 7 cycles at 600 °C.

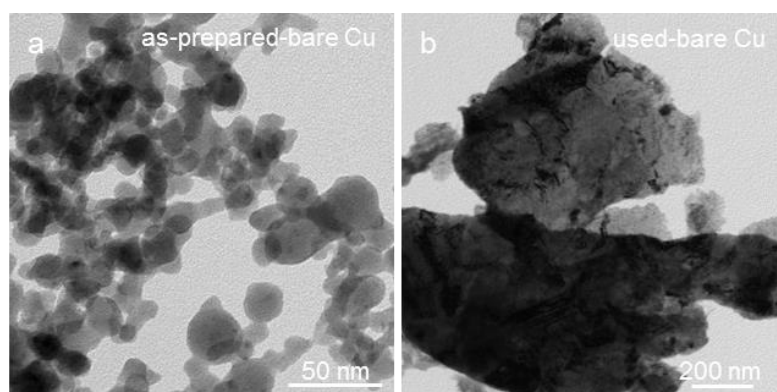

**Fig. S3.** TEM images of bare Cu catalyst.

As shown in **Fig. S3a**, as-prepared bare Cu catalyst was the about 20–40 nm of particles. After reaction, the Cu NPs agglomerated and grown significantly (**Fig. S3b**).

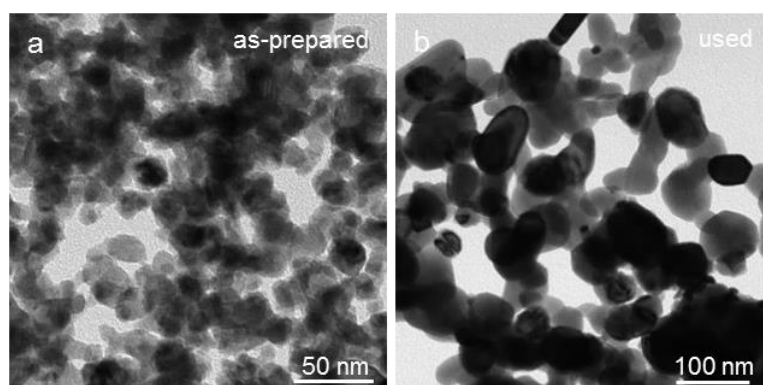

**Fig. S4.** TEM images of conventional Cu/Y<sub>2</sub>O<sub>3</sub> catalyst.

As shown in **Fig. S4a**, as-prepared conventional Cu/Y<sub>2</sub>O<sub>3</sub> catalyst was the particle about 20–40 nm. After reaction, the conventional Cu/Y<sub>2</sub>O<sub>3</sub> catalyst agglomerated and grown significantly (**Fig. S4b**).

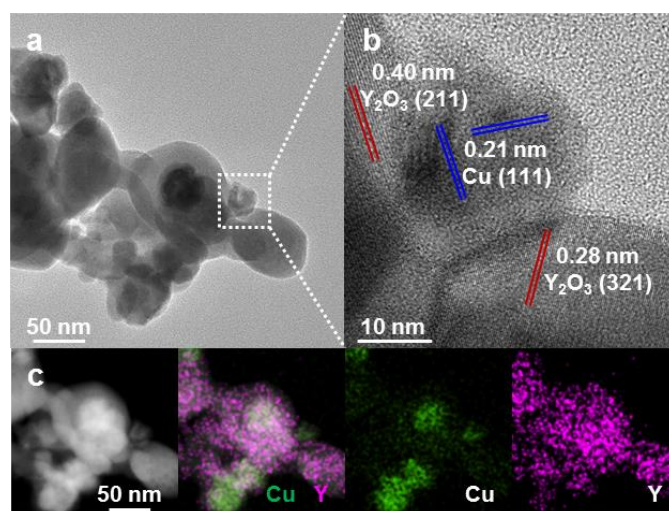

**Fig. S5.** TEM, HRTEM and EDS element mapping images of used conventional Cu/Y<sub>2</sub>O<sub>3</sub> catalyst.

In **Fig. S5a**, the used conventional Cu/Y<sub>2</sub>O<sub>3</sub> catalyst was the particle about 10–100 nm. HRTEM image displayed that the surface of the small particles in **Fig. S5a** had the lattice fringes with clear spacing of 0.21 nm, which could be attributed to Cu (111) (**Fig. S5b**). Additionally, the HRTEM image displayed that the surface of the large particle in **Fig. S5a** had the lattice fringes with clear spacing of 0.28 and 0.40 nm, which could be attributed to Y<sub>2</sub>O<sub>3</sub> (321) and Y<sub>2</sub>O<sub>3</sub> (211), respectively (**Fig. S5b**). EDS element mapping images also clearly showed that Cu NPs were embedded on the surface of Y<sub>2</sub>O<sub>3</sub> NPs (**Fig. S5c**). These results indicated that Cu NPs embedded on Y<sub>2</sub>O<sub>3</sub> NPs constituted a clear interface structure.

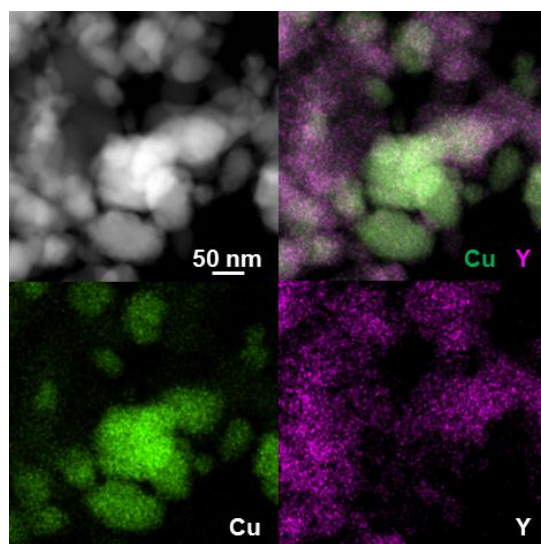

**Fig. S6.** EDS element mapping images of the used conventional Cu/Y<sub>2</sub>O<sub>3</sub> catalyst.

EDS element mapping images shown that the Cu NPs (10–50 nm) were seriously agglomerated on the surface of Y<sub>2</sub>O<sub>3</sub>, implying the conventional Cu/Y<sub>2</sub>O<sub>3</sub> interface on conventional Cu/Y<sub>2</sub>O<sub>3</sub> catalyst might be unevenly dispersed.



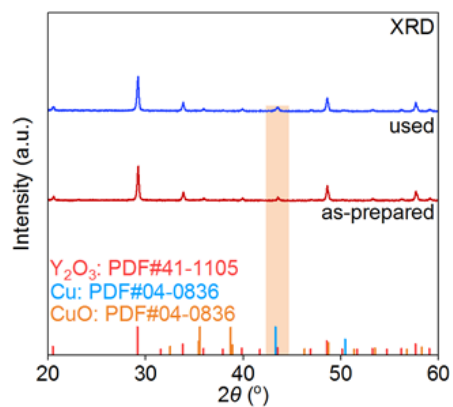

**Fig. S7.** XRD patterns of conventional Cu/Y<sub>2</sub>O<sub>3</sub> catalyst.

XRD patterns displayed that as-prepared and used conventional Cu/Y<sub>2</sub>O<sub>3</sub> catalysts exhibited a significant Y<sub>2</sub>O<sub>3</sub> (PDF#41-1105) characteristic diffraction peak. There was no diffraction peak of Cu species, which might be caused by low loading or better dispersion.

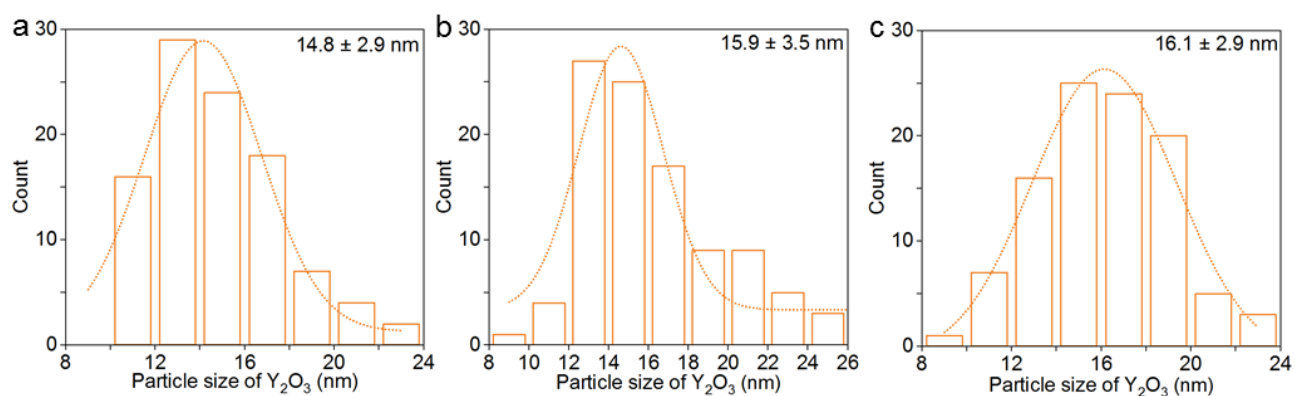

**Fig. S8.** Statistical diagram of  $\text{Y}_2\text{O}_3$  NPs size on inverse  $\text{Y}_2\text{O}_3/\text{Cu}$  catalyst operated for (a) 1 h, (b) 20 h and (c) 100 h at 600 °C, where the corresponding TEM images were shown in **Fig. 4a-c**.

The size of  $\text{Y}_2\text{O}_3$  NPs on the surface of inverse  $\text{Y}_2\text{O}_3/\text{Cu}$  catalyst was 14.8 nm after reaction (**Fig. 8a**). The size of  $\text{Y}_2\text{O}_3$  NPs increased to 15.9 nm and 16.1 nm after long-term stability tests for 20 h (**Fig. 8b**) and 100 h (**Fig. 8c**).

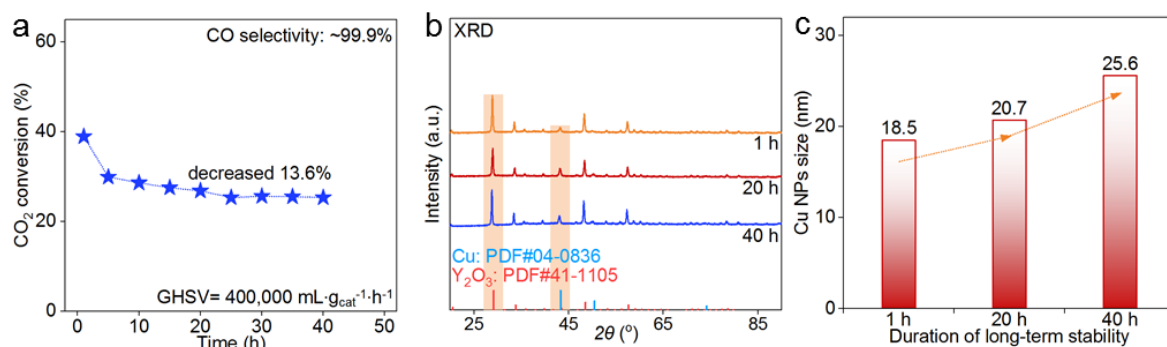

**Fig. S9.** (a) The long-term stability at 600 °C, (b) XRD patterns and (c) the average size of Cu NPs for conventional 20Cu/Y<sub>2</sub>O<sub>3</sub> catalyst.

Since the diffraction peak of Cu species was not detected in XRD patterns of the conventional Cu/Y<sub>2</sub>O<sub>3</sub> catalyst with a loading capacity of 10%, the conventional Cu/Y<sub>2</sub>O<sub>3</sub> catalyst with a loading capacity of 20% was explored here. After a long-term stability test of up to 40 h, the CO<sub>2</sub> conversion of conventional 20Cu/Y<sub>2</sub>O<sub>3</sub> catalysts was decreased by more than 13.6% (**Fig. S9a**). XRD patterns displayed that the used conventional 20Cu/Y<sub>2</sub>O<sub>3</sub> catalysts exhibited a significant Y<sub>2</sub>O<sub>3</sub> (PDF#41-1105) characteristic diffraction peak (**Fig. S9b**). The intensity of characteristic diffraction peak at 43.3° did not match the Y<sub>2</sub>O<sub>3</sub> on XRD patterns of conventional 20Cu/Y<sub>2</sub>O<sub>3</sub> catalyst (**Fig. S9b**), which might be the characteristic diffraction peak of metal Cu (PDF#04-0836). The remarkable agglomeration of Cu NPs could be observed on the conventional 20Cu/Y<sub>2</sub>O<sub>3</sub> catalyst by calculating the Cu NPs size under different treatment conditions (Scherrer formula). The size of Cu NPs on conventional 20Cu/Y<sub>2</sub>O<sub>3</sub> catalyst after reaction was 18.5 nm, which increased significantly to 20.7 nm after reaction for 20 h (**Fig. S9c**). When the reaction time was 40 h, the size of Cu NPs was stable at 25.6 nm.

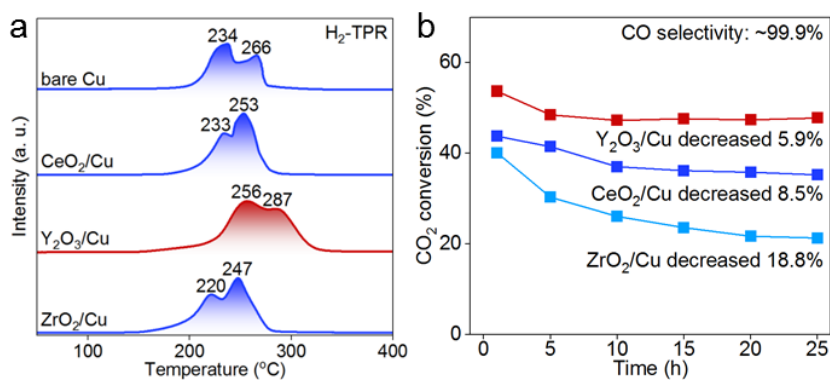

**Fig. S10.** (a) H<sub>2</sub>-TPR profiles of various catalysts. (b) Long-term stability of RWGS reaction over various catalysts. (Reaction condition: 23%CO<sub>2</sub>/69%H<sub>2</sub>/8%N<sub>2</sub>, GHSV = 400,000 mL·g<sub>cat</sub><sup>-1</sup>·h<sup>-1</sup>)

The metal-support interaction of the prepared comparable CeO<sub>2</sub>/Cu and ZrO<sub>2</sub>/Cu catalysts was weaker than that of Y<sub>2</sub>O<sub>3</sub>/Cu catalyst (**Fig. S10a**), so the long-term stability of CeO<sub>2</sub>/Cu and ZrO<sub>2</sub>/Cu catalysts is relatively poor (**Fig. S10b**).

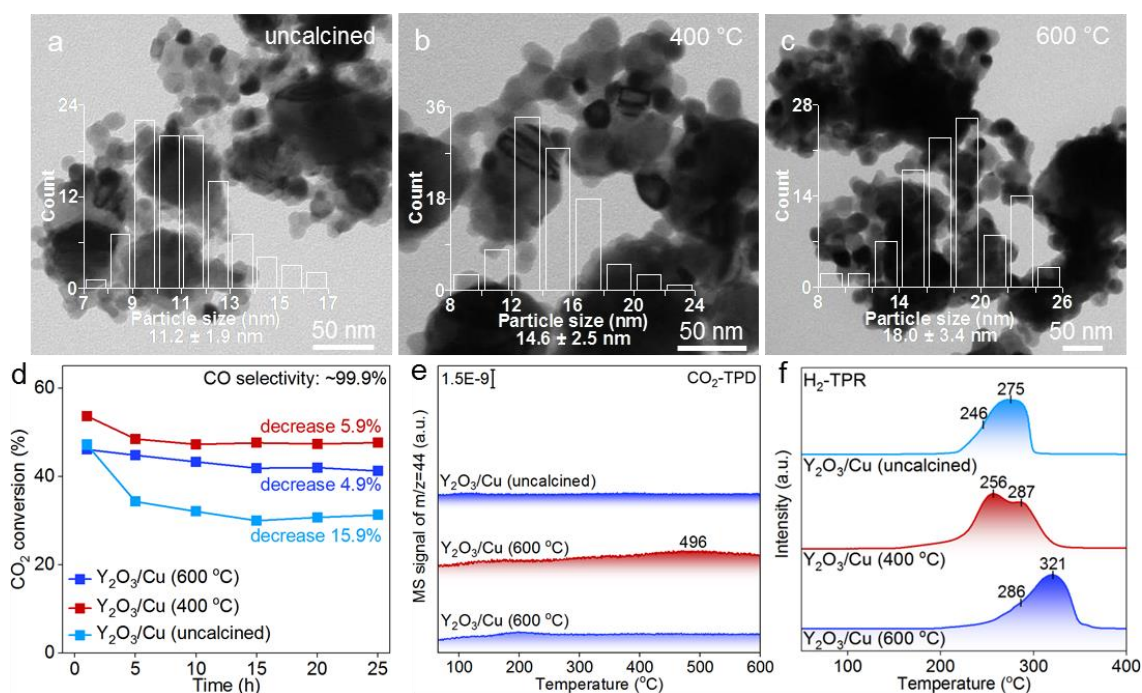

**Fig. S11.** (a–c) TEM images of used inverse Y<sub>2</sub>O<sub>3</sub>/Cu catalysts prepared at different calcination temperatures. (d) Long-term stability of RWGS reaction over various catalysts. (Reaction condition: 23%CO<sub>2</sub>/69%H<sub>2</sub>/8%N<sub>2</sub>, GHSV = 400,000 mL·g<sub>cat</sub><sup>-1</sup>·h<sup>-1</sup>). (e) CO<sub>2</sub>-TPD profiles of various catalysts. (f) H<sub>2</sub>-TPR profiles of various catalysts.

The Y<sub>2</sub>O<sub>3</sub>/Cu (uncalcined), Y<sub>2</sub>O<sub>3</sub>/Cu (400 °C, the inverse Y<sub>2</sub>O<sub>3</sub>/Cu catalyst in manuscript) and Y<sub>2</sub>O<sub>3</sub>/Cu (600 °C) catalysts were prepared by adjusting the calcination temperature, where the Y<sub>2</sub>O<sub>3</sub> size of Y<sub>2</sub>O<sub>3</sub>/Cu (uncalcined), Y<sub>2</sub>O<sub>3</sub>/Cu (400 °C) and Y<sub>2</sub>O<sub>3</sub>/Cu (600 °C) catalysts after reaction were 11.2, 14.6 and 18.0 nm (Fig. S11a–c). The CO<sub>2</sub> conversion of catalyst Y<sub>2</sub>O<sub>3</sub>/Cu (uncalcined) and Y<sub>2</sub>O<sub>3</sub>/Cu (600 °C) was significantly lower than Y<sub>2</sub>O<sub>3</sub>/Cu (400 °C) catalyst (Fig. S11d). Meanwhile, Fig. S11e indicated that CO<sub>2</sub> adsorption capacity of Y<sub>2</sub>O<sub>3</sub>/Cu (400 °C) catalyst was excellent than Y<sub>2</sub>O<sub>3</sub>/Cu (uncalcined) and Y<sub>2</sub>O<sub>3</sub>/Cu (600 °C) catalysts, which was consistent with the catalytic activity (Fig. S11d). These results indicated that only appropriate Y<sub>2</sub>O<sub>3</sub> size could promote the adsorption of CO<sub>2</sub> to improve the catalytic activity. In addition, Fig. S11d indicated that the long-term stability of Y<sub>2</sub>O<sub>3</sub>/Cu catalysts gradually increased with raising the calcination temperature. After reaction for 25 h, Y<sub>2</sub>O<sub>3</sub>/Cu (600 °C) catalyst showed the best long-term stability with decreasing of only 4.9%. Meanwhile, H<sub>2</sub>-TPR profiles (Fig. S11f) shown that with raising calcination temperature, the reduction temperature of Y<sub>2</sub>O<sub>3</sub>/Cu catalysts also increased gradually, indicating that the metal-support interaction was enhanced, which was consistent with the results of catalytic stability (Fig. S11d). Therefore, it was again confirmed that Cu-Y<sub>2</sub>O<sub>3</sub> interaction generated by interface could improve catalytic stability. However, the strength of metal-support interaction (Fig. S11f) did not match the CO<sub>2</sub> adsorption capacity (Fig. S11e), illustrating that there was no convincing law between metal-support interaction and CO<sub>2</sub> adsorption strength. In other words, only the appropriate metal-support interaction could promote the adsorption of CO<sub>2</sub> to improve the catalytic activity.

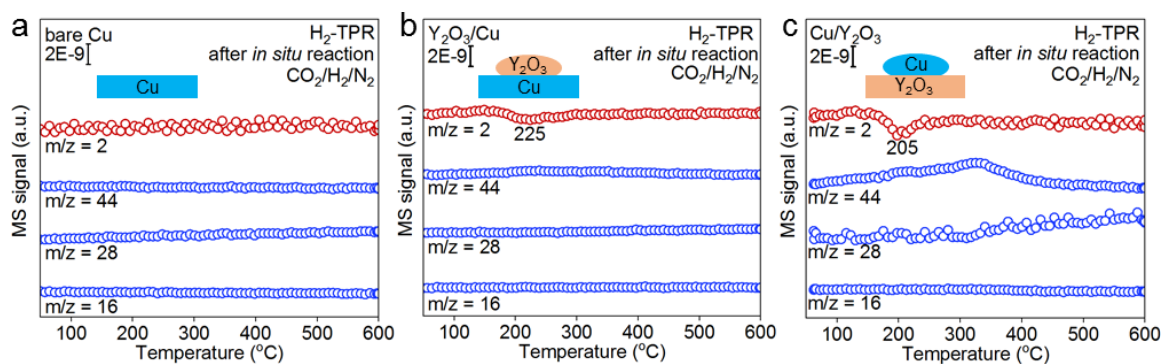

**Fig. S12.** H<sub>2</sub>-TPR profiles collected after *in situ* reaction at 600 °C for 1 h in a mixed-gas (23%CO<sub>2</sub>/69%H<sub>2</sub>/8%N<sub>2</sub>) over bare Cu, inverse Y<sub>2</sub>O<sub>3</sub>/Cu and conventional Cu/Y<sub>2</sub>O<sub>3</sub> catalysts.

There was no H<sub>2</sub> consumption signal in the H<sub>2</sub>-TPR profiles of bare Cu catalyst after reaction at 600 °C in mixed-gas (23%CO<sub>2</sub>/69%H<sub>2</sub>/8%N<sub>2</sub>) for 1 h (**Fig. S12a**). The H<sub>2</sub>-TPR profiles of inverse Y<sub>2</sub>O<sub>3</sub>/Cu and conventional Cu/Y<sub>2</sub>O<sub>3</sub> catalyst after reaction at 600 °C in mixed-gas (23%CO<sub>2</sub>/69%H<sub>2</sub>/8%N<sub>2</sub>) for 1 h showed a clear H<sub>2</sub> consumption signal (m/z = 2) at 150–300 °C without any hydrogenation product formation, suggesting the Cu<sup>δ+</sup> species might be reduced (**Fig. S12b** and **12c**).

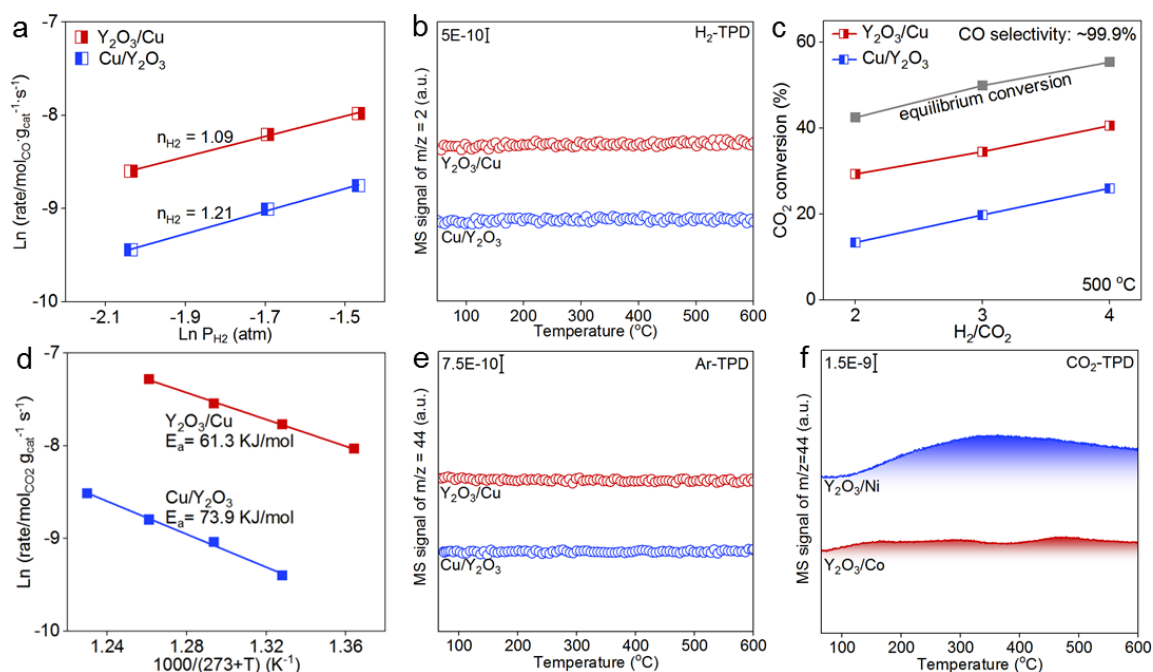

**Fig. S13.** (a) The H<sub>2</sub> reaction order (600 °C, the detailed data were summarized in **Table S4**), (b) H<sub>2</sub>-TPD profiles of Y<sub>2</sub>O<sub>3</sub>/Cu and Cu/Y<sub>2</sub>O<sub>3</sub> catalysts. (c) RWGS reaction performance in mixed gas with different CO<sub>2</sub>/H<sub>2</sub> ratios (Reaction condition: The content of CO<sub>2</sub> in mixed gas is 10%, GHSV = 400,000 mL·g<sub>cat</sub><sup>-1</sup>·h<sup>-1</sup>), (d) Arrhenius plots in kinetic range (The detailed data were summarized in **Table S5**) and (e) Ar-TPD and (f) CO<sub>2</sub>-TPD profiles of various catalysts.

The H<sub>2</sub> reaction order of inverse Y<sub>2</sub>O<sub>3</sub>/Cu catalyst was significantly lower than conventional Cu/Y<sub>2</sub>O<sub>3</sub> catalyst (**Fig. S13a**), which indicated that the inverse Y<sub>2</sub>O<sub>3</sub>/Cu catalyst was conducive to improving the adsorption and activation capacity of H<sub>2</sub>. The H<sub>2</sub>-TPD profiles (**Fig. S13b**) confirmed that the H<sub>2</sub> adsorption capacity of inverse Y<sub>2</sub>O<sub>3</sub>/Cu and conventional Cu/Y<sub>2</sub>O<sub>3</sub> catalysts was very weak. In addition, with increasing of H<sub>2</sub> content in mixed gas, the CO<sub>2</sub> conversion of both inverse Y<sub>2</sub>O<sub>3</sub>/Cu and conventional Cu/Y<sub>2</sub>O<sub>3</sub> catalysts continued to increase (**Fig. S13c**), indicating that the concentration of H<sub>2</sub> played the important role in improving the RWGS reaction performance. The lower activation energy of the inverse Y<sub>2</sub>O<sub>3</sub>/Cu catalyst also indicated that it was more conducive to promoting the occurrence of RWGS reaction (**Fig. S13d**). Inverse Y<sub>2</sub>O<sub>3</sub>/Cu and conventional Cu/Y<sub>2</sub>O<sub>3</sub> catalysts did not decompose to produce the signal of CO<sub>2</sub> (**Fig. S13e**). The inverse Y<sub>2</sub>O<sub>3</sub>/Co and Y<sub>2</sub>O<sub>3</sub>/Ni catalysts constructed by Ni and Co metals and Y<sub>2</sub>O<sub>3</sub> also had excellent CO<sub>2</sub> adsorption capacity (**Fig. S13f**), indicated that Y<sub>2</sub>O<sub>3</sub> could effectively improve the CO<sub>2</sub> adsorption capacity of inverse catalysts.

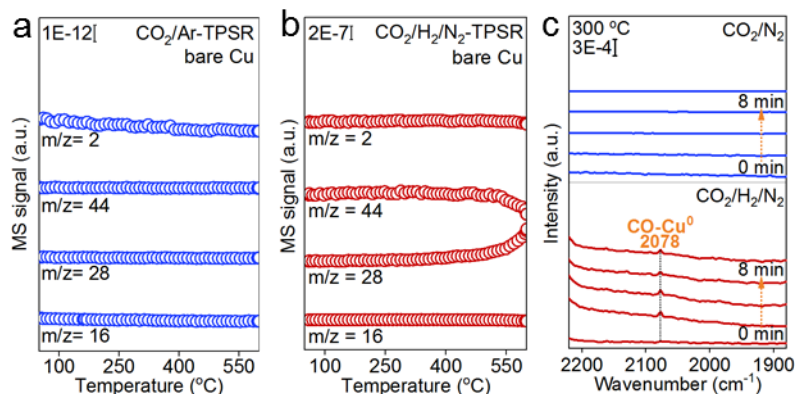

**Fig. S14.** TPSR results of bare Cu catalyst in (a) 2%CO<sub>2</sub>/98%N<sub>2</sub> and (b) 23%CO<sub>2</sub>/69%H<sub>2</sub>/8%N<sub>2</sub>. (c) *In situ* DRIFTS spectra of Cu/Y<sub>2</sub>O<sub>3</sub> catalyst collected in 2%CO<sub>2</sub>/98%N<sub>2</sub> and 23%CO<sub>2</sub>/69%H<sub>2</sub>/8%N<sub>2</sub> at 300 °C.

There was no CO generation signal in CO<sub>2</sub>/Ar, while significant CO generation signal appeared in CO<sub>2</sub>/H<sub>2</sub>/N<sub>2</sub> before 500 °C, indicating that the synergistic reaction mechanism was followed on bare Cu catalyst (**Fig. S14a and b**). There was no CO related signal on *In situ* DRIFTS spectra of Cu/Y<sub>2</sub>O<sub>3</sub> catalyst collected in CO<sub>2</sub>/Ar, while significant CO-Cu<sup>0</sup> signal (2078 cm<sup>-1</sup>) appeared on *In situ* DRIFTS spectra of Cu/Y<sub>2</sub>O<sub>3</sub> catalyst collected in CO<sub>2</sub>/H<sub>2</sub>/N<sub>2</sub> (The absence of CO gas signal might be caused by the poor activity of Cu/Y<sub>2</sub>O<sub>3</sub> catalyst), indicating that the synergistic reaction mechanism was followed on Cu/Y<sub>2</sub>O<sub>3</sub> catalyst (**Fig. S14c**).



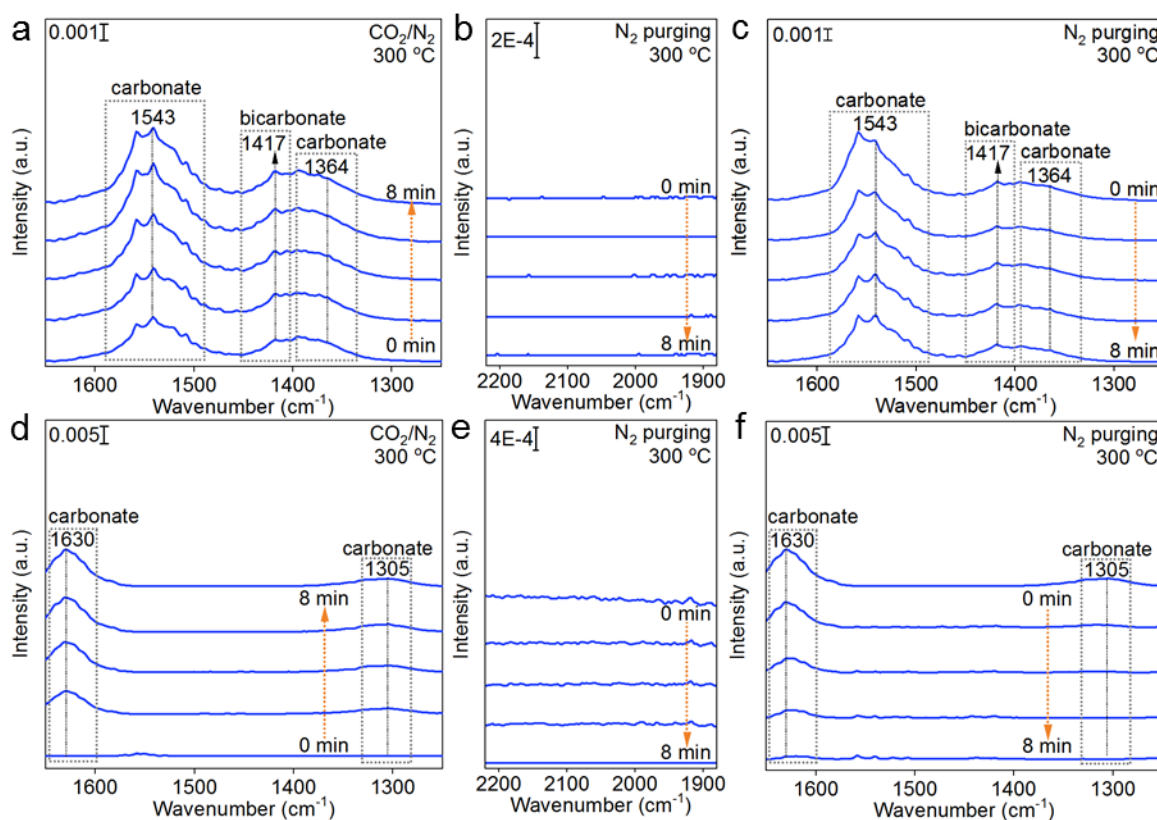

**Fig. S15.** *In situ* DRIFTS spectra of inverse  $\text{Y}_2\text{O}_3/\text{Cu}$  catalyst collected in (a) 2% $\text{CO}_2/98\%\text{N}_2$  and (b,c)  $\text{N}_2$  after 2% $\text{CO}_2/98\%\text{N}_2$  pretreatment at 300 °C. *In situ* DRIFTS spectra of conventional  $\text{Cu}/\text{Y}_2\text{O}_3$  catalyst collected in (a) 2% $\text{CO}_2/98\%\text{N}_2$  and (b,c)  $\text{N}_2$  after 2% $\text{CO}_2/98\%\text{N}_2$  pretreatment at 300 °C.

*In situ* DRIFTS spectra showed that there were significant carbonate species on both the inverse  $\text{Y}_2\text{O}_3/\text{Cu}$  catalyst (Fig. S15a, 1364, 1417 and 1543  $\text{cm}^{-1}$ ) and conventional  $\text{Cu}/\text{Y}_2\text{O}_3$  catalyst (Fig. S15d, 1305 and 1630  $\text{cm}^{-1}$ ), indicating that both catalysts could achieve effective  $\text{CO}_2$  activation. However, when switching to high purity  $\text{N}_2$  gas purge, the inverse  $\text{Y}_2\text{O}_3/\text{Cu}$  catalyst (Fig. S15b and S15c) showed a relatively stronger  $\text{CO}_2$  adsorption capacity than conventional  $\text{Cu}/\text{Y}_2\text{O}_3$  catalyst (Fig. S15e and S15f), which was consistent with the results of  $\text{CO}_2$ -TPD (Fig. S6).

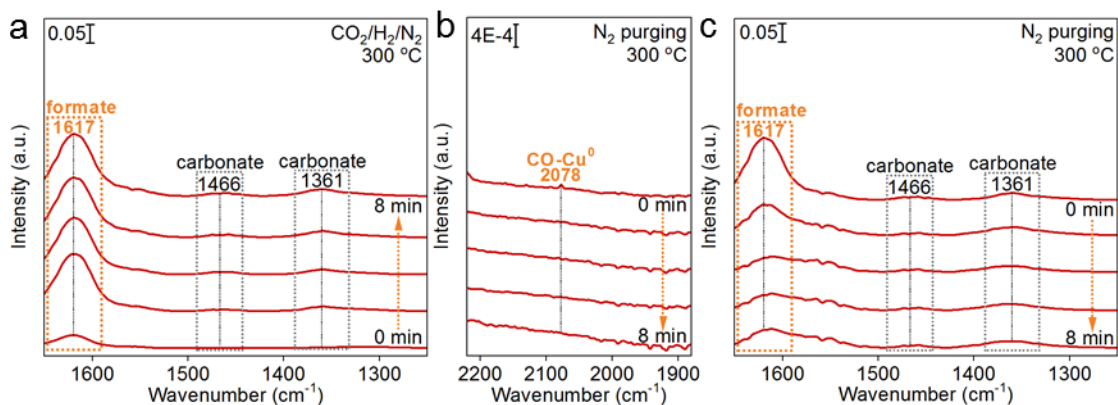

**Fig. S16.** *In situ* DRIFTS spectra of conventional Cu/Y<sub>2</sub>O<sub>3</sub> catalyst collected in (a) 23%CO<sub>2</sub>/69%H<sub>2</sub>/8%N<sub>2</sub> and (b,c) N<sub>2</sub> after 23%CO<sub>2</sub>/69%H<sub>2</sub>/8%N<sub>2</sub> pretreatment at 300 °C.

*In situ* DRIFTS spectra further clarified the RWGS reaction mechanism on conventional Cu/Y<sub>2</sub>O<sub>3</sub> catalyst. As shown in **Fig. S16a**, the carbonate (1361 and 1466 cm<sup>-1</sup>) and formate (1617 cm<sup>-1</sup>) signal appeared on the *in situ* DRIFTS spectra in 23%CO<sub>2</sub>/69%H<sub>2</sub>/8%N<sub>2</sub> at 300 °C. When switching to N<sub>2</sub> purge, the CO-Cu<sup>0</sup> signals (**Fig. S16b**, 2078 cm<sup>-1</sup>) rapidly decreased, while the signal strength of carbonate (1361 and 1466 cm<sup>-1</sup>) and formate (1617 cm<sup>-1</sup>) (**Fig. S16c**) also slowly decreased. These findings further revealed that the RWGS reaction followed a synergistic reaction path on conventional Cu/Y<sub>2</sub>O<sub>3</sub> catalyst.

## Supplementary Tables:

**Table S1.** Comparison of reaction rates of various catalysts.

| Entry | Samples                                       | Temperature | Reaction rate (mmol <sub>CO</sub> /g <sub>cat</sub> /s) | References        |
|-------|-----------------------------------------------|-------------|---------------------------------------------------------|-------------------|
| 1     | Inverse Y <sub>2</sub> O <sub>3</sub> /Cu     | 500         | 529.9                                                   | This work         |
| 2     | Conventional Cu/Y <sub>2</sub> O <sub>3</sub> | 500         | 144.7                                                   | This work         |
| 3     | bare Cu                                       | 500         | 3.1                                                     | This work         |
| 4     | Cu-Zn-Al                                      | 500         | 261.0                                                   | <a href="#">1</a> |
| 5     | Cu-Al spinel                                  | 600         | 179.0                                                   | <a href="#">2</a> |
| 6     | Pt/TiO <sub>2</sub>                           | 400         | 50.0                                                    | <a href="#">3</a> |
| 7     | Cu-CeO <sub>2</sub>                           | 500         | 46.6                                                    | <a href="#">4</a> |
| 8     | TiO <sub>2</sub> /Cu                          | 500         | 17.8                                                    | <a href="#">5</a> |
| 9     | NP-Cr <sub>2</sub> O <sub>3</sub> /Cu         | 400         | 19.7                                                    | <a href="#">6</a> |

**Table S2.** Related parameters of various catalysts.

| Samples                                             | $S_{\text{BET}}$ ( $\text{m}^2/\text{g}$ ) <sup>a</sup> | Atomic (%) <sup>b</sup> |      |      | Size of NPs (nm) <sup>c</sup> |                                   |
|-----------------------------------------------------|---------------------------------------------------------|-------------------------|------|------|-------------------------------|-----------------------------------|
|                                                     |                                                         | Y                       | Cu   | O    | Cu NPs                        | Y <sub>2</sub> O <sub>3</sub> NPs |
| Conventional Cu/Y <sub>2</sub> O <sub>3</sub> -used | 40.0                                                    | 29.7                    | 9.6  | 60.7 | -                             | 34.5                              |
| Inverse Y <sub>2</sub> O <sub>3</sub> /Cu-used      | 41.5                                                    | 21.6                    | 33.5 | 44.9 | 31.5                          | 14.8                              |

<sup>a</sup> Calculated by the BET method. <sup>b</sup> Characterized by XPS. <sup>c</sup> The value was obtained by Scherrer formula and XRD patterns.

The Cu NPs size of used inverse Y<sub>2</sub>O<sub>3</sub>/Cu calculated by XRD (31.5 nm) was much smaller than that observed by TEM (> 100 nm). The super-sized Cu NPs observed in TEM image might be caused by the agglomeration of several small Cu NPs.

**Table S3.** Estimation of the number of interfaces on the surface of catalysts.

| Samples                                                    | Interface sites        |                        |                        | Deactivation ratio (%) <sup>b</sup> |
|------------------------------------------------------------|------------------------|------------------------|------------------------|-------------------------------------|
|                                                            | used                   | used (20 h)            | used (100 h)           |                                     |
| Conventional Cu/Y <sub>2</sub> O <sub>3</sub> <sup>a</sup> | 3.1 × 10 <sup>18</sup> | 2.2 × 10 <sup>18</sup> | 1.4 × 10 <sup>18</sup> | 53.0                                |
| Inverse Y <sub>2</sub> O <sub>3</sub> /Cu                  | 5.2 × 10 <sup>18</sup> | 3.9 × 10 <sup>18</sup> | 3.2 × 10 <sup>18</sup> | 39.3                                |

<sup>a</sup> There were no significant characteristic diffraction peaks of Cu species on XRD pattern of conventional Cu/Y<sub>2</sub>O<sub>3</sub> catalyst due to the low load, so only the number of interface sites on conventional 20Cu/Y<sub>2</sub>O<sub>3</sub> catalyst was calculated.

<sup>b</sup> The deactivation ratio referred to the ratio for number of decreased interface sites (100 h) to initial interface sites.

The detailed calculation process for number of interface sites was as follows: Under ideal conditions, the number of interfacial sites (A) for inverse Y<sub>2</sub>O<sub>3</sub>/Cu could be measured by the number of Cu atoms at the interface.<sup>7-9</sup> The perimeter of the Y<sub>2</sub>O<sub>3</sub>-Cu interface was ideally thought to be equal to the maximum perimeter of Y<sub>2</sub>O<sub>3</sub> NPs (Y<sub>2</sub>O<sub>3</sub> NPs were ideally thought to be spherical). Therefore, it was only necessary to calculate the number of Cu atoms in the maximum circumference of Y<sub>2</sub>O<sub>3</sub> NPs, and the number of interfacial sites of each Y<sub>2</sub>O<sub>3</sub> NPs of catalyst could be obtained. The number of interfacial sites on conventional Cu/Y<sub>2</sub>O<sub>3</sub> catalyst was calculated by using the same method.<sup>7-9</sup> The number of interface sites on 1 g catalyst was calculated in [Table S3](#).

**Table S4.** Raw data of reaction order results for various catalysts.

| Reaction order  | Catalyst                          | CO <sub>2</sub> conv. (%) | Flow (mL/min) | Ln P <sub>H<sub>2</sub></sub> (atm) | CO <sub>2</sub> content (%) | Rate (mol/s/gcat) | Ln(Rate) |
|-----------------|-----------------------------------|---------------------------|---------------|-------------------------------------|-----------------------------|-------------------|----------|
| H <sub>2</sub>  | Cu/Y <sub>2</sub> O <sub>3</sub>  | 7.46                      | 46            | -2.04                               | 65.2                        | 7.93E-05          | -9.44    |
|                 |                                   | 11.52                     | 49            | -1.69                               | 61.2                        | 1.22E-04          | -9.01    |
|                 |                                   | 14.85                     | 52            | -1.47                               | 57.7                        | 1.58E-04          | -8.75    |
|                 | Y <sub>2</sub> O <sub>3</sub> /Cu | 8.25                      | 46            | -2.04                               | 65.2                        | 1.84E-04          | -8.60    |
|                 |                                   | 12.25                     | 49            | -1.69                               | 61.2                        | 2.73E-04          | -8.20    |
|                 |                                   | 15.32                     | 52            | -1.47                               | 57.7                        | 3.42E-04          | -7.98    |
| CO <sub>2</sub> | Cu/Y <sub>2</sub> O <sub>3</sub>  | 14.30                     | 35            | -1.25                               | 28.6                        | 9.67E-05          | -9.24    |
|                 |                                   | 12.23                     | 40            | -0.98                               | 37.5                        | 1.24E-04          | -8.99    |
|                 |                                   | 10.45                     | 45            | -0.81                               | 44.4                        | 1.41E-04          | -8.86    |
|                 | Y <sub>2</sub> O <sub>3</sub> /Cu | 13.45                     | 35            | -1.25                               | 28.6                        | 3.45E-04          | -7.97    |
|                 |                                   | 10.45                     | 40            | -0.98                               | 37.5                        | 4.02E-04          | -7.82    |
|                 |                                   | 8.88                      | 45            | -0.81                               | 44.4                        | 4.56E-04          | -7.69    |

Notes: CO select. = 100%; H<sub>2</sub> reaction order: m<sub>cat.</sub> (Cu/Y<sub>2</sub>O<sub>3</sub>) = 21.0 mg, m<sub>cat.</sub> (Y<sub>2</sub>O<sub>3</sub>/Cu) = 10.0 mg; CO<sub>2</sub> reaction order: m<sub>cat.</sub> (Cu/Y<sub>2</sub>O<sub>3</sub>) = 11.0 mg, m<sub>cat.</sub> (Y<sub>2</sub>O<sub>3</sub>/Cu) = 2.9 mg

**Table S5.** Raw data of activation energy results for various catalysts.

| Catalysts                         | Temperature (°C) | 1000/(t+273) | CO <sub>2</sub> conv. (%) | Flow (mL/min) | Rate (mol/s/gcat) | Ln(Rate) |
|-----------------------------------|------------------|--------------|---------------------------|---------------|-------------------|----------|
| Cu/Y <sub>2</sub> O <sub>3</sub>  | 480              | 1.33         | 13.41                     | 36.0          | 2.51E-05          | -10.59   |
|                                   | 500              | 1.29         | 11.55                     | 60.0          | 3.66E-05          | -10.22   |
|                                   | 520              | 1.26         | 14.72                     | 60.0          | 4.90E-05          | -9.92    |
|                                   | 540              | 1.23         | 14.63                     | 80.0          | 8.26E-05          | -9.40    |
| Y <sub>2</sub> O <sub>3</sub> /Cu | 460              | 1.36         | 10.61                     | 43.9          | 1.56E-04          | -8.76    |
|                                   | 480              | 1.33         | 10.34                     | 59.5          | 2.06E-04          | -8.49    |
|                                   | 500              | 1.29         | 11.16                     | 74.0          | 2.77E-04          | -8.19    |
|                                   | 520              | 1.26         | 10.09                     | 97.2          | 3.29E-04          | -8.02    |

Notes:  $m_{\text{cat.}}(\text{Cu/Y}_2\text{O}_3) = 10.0$  mg,  $m_{\text{cat.}}(\text{Y}_2\text{O}_3/\text{Cu}) = 5.1$  mg, CO select. = 100%, 23%CO<sub>2</sub>/69%H<sub>2</sub>/8%N<sub>2</sub>

## Reference

- 1 X. Zhang, X. Zhu, L. Lin, S. Yao, M. Zhang, X. Liu, X. Wang, Y. Li, C. Shi and D. Ma, *ACS Catal.*, 2017, **7**, 912.
- 2 A. M. Bahmanpour, F. Héroguel, M. Kilic, C. J. Baranowski, L. Artiglia, U. Röthlisberger, J. S. Luterbacher and O. Kröcher, *ACS Catal.*, 2019, **9**, 6243.
- 3 X. Chen, X. Su, H. Duan, B. Liang, Y. Huang and T. Zhang, *Catal. Today*, 2017, **281**, 312.
- 4 G. Kim, S. H. Ryu, H. Jeong, Y. Choi, S. Lee, J. H. Choi and H. Lee, *Angew. Chem. Int. Edit.*, 2023, e202306017.
- 5 Y. Yu, R. Jin, J. Easa, W. Lu, M. Yang, X. Liu, Y. Xing and Z. Shi, *Chem. Commun.*, 2019, **55**, 4178.
- 6 Y. Shen, Z. Xiao, J. Liu and Z. Wang, *Chemcatchem*, 2019, **11**, 5439.
- 7 A. Jia, S. Jiang, J. Lu and M. Luo, *J. Phys. Chem. C*, 2010, **114**, 21605.
- 8 H. Yan, C. Yang, W. Shao, L. Cai, W. Wang, Z. Jin and C. Jia, *Nat. Commun.*, 2019, **10**, 3470.
- 9 K. Xu, C. Ma, H. Yan, H. Gu, W. Wang, S. Li, Q. Meng, W. Shao, G. Ding, F. R. Wang and C. Jia, *Nat. Commun.*, 2022, **13**, 2443.
